# Supplementary material for: Whole Blood Gene Expression Profiles in Insulin Resistant Latinos with the Metabolic Syndrome
Source: PubMed Central journal article supplement (PMC3866261; doi:10.1371/journal.pone.0084002), 2013-12-17
Supplement: pone.0084002.s001.pdf [file pone.0084002.s001.pdf]

**Table S1** Characteristics of subjects classified into one of two groups based on metabolic syndrome criteria and sex separated within those two groups

|                                             | Met Syn-NO  |               | P Value Met Syn-NO | Met Syn-YES              |                          | P Value Met Syn-YES |
|---------------------------------------------|-------------|---------------|--------------------|--------------------------|--------------------------|---------------------|
|                                             | Male (n=36) | Female (n=74) | Male vs. Female    | Male (n=25)              | Female (n=49)            | Male vs. Female     |
| <b>Gender</b>                               |             |               |                    |                          |                          |                     |
| <b>Age (years)</b>                          | 36.4±1.5    | 33.8±1.2      | NS                 | 36.5 ±2.3                | 40.5 ±1.7*               | <0.05               |
| <b>Body Mass Index (kg/m<sup>2</sup>)</b>   | 27.9±0.8    | 28.5±0.7      | NS                 | 36.2± 2.8 <sup>†</sup>   | 34.5± 1.0 <sup>†</sup>   | NS                  |
| <b>Body Fat (%)</b>                         | 21.9±1.0    | 32.3±0.7      | <0.0001            | 28.3± 1.7*               | 37.7± 0.9 <sup>†</sup>   | <0.0001             |
| <b>Systolic Blood Pressure (mmHg)</b>       | 120.6±2.1   | 111.8±1.1     | <0.001             | 132.2± 3.6*              | 126.6±3.1 <sup>†</sup>   | NS                  |
| <b>Diastolic Blood Pressure (mmHg)</b>      | 78.0±1.3    | 74.0±0.9      | <0.05              | 82.6± 2.1                | 81.0± 1.5 <sup>†</sup>   | NS                  |
| <b>Waist Circumference (cm)</b>             | 96.9±1.9    | 94.2±1.6      | NS                 | 113.2± 3.3 <sup>†</sup>  | 107.0± 2.0 <sup>†</sup>  | <0.05               |
| <b>Hip Circumference (cm)</b>               | 102.6±1.4   | 106.1±1.3     | NS                 | 113.1± 2.1 <sup>†</sup>  | 117.8± 2.0 <sup>†</sup>  | NS                  |
| <b>Cholesterol</b>                          | 172.8 ± 5.6 | 164.0 ± 3.4   | NS                 | 196.6 ± 7.8*             | 188.2 ± 5.9*             | NS                  |
| <b>Triglyceride (mg/dL)</b>                 | 122.7±9.1   | 100.3±4.3     | <0.05              | 229.1± 22.4 <sup>†</sup> | 192.3± 14.3 <sup>†</sup> | NS                  |
| <b>High Density Lipoprotein (mg/dL)</b>     | 41.3±1.5    | 50.9±1.3      | <0.0001            | 33.4± 1.3**              | 39.7± 1.2 <sup>†</sup>   | <0.05               |
| <b>Low Density Lipoprotein (mg/dL)</b>      | 111.1±4.6   | 98.1±2.9      | <0.05              | 121.5± 8.7               | 115.4± 3.9*              | NS                  |
| <b>Very Low Density Lipoprotein (mg/dL)</b> | 20.5±1.5    | 16.8±0.7      | <0.05              | 33.2± 2.8**              | 29.8± 1.7 <sup>†</sup>   | NS                  |
| <b>Alanine Aminotransferase (IU/L)</b>      | 29.8±3.0    | 19.5±1.1      | <0.001             | 54.5± 6.5**              | 35.4± 4.0 <sup>†</sup>   | <0.05               |
| <b>Aspartate Aminotransferase (IU/L)</b>    | 25.0±1.8    | 21.9±1.0      | NS                 | 34.6± 3.6*               | 29.0± 2.4*               | NS                  |
| <b>Hemoglobin A1c (%)</b>                   | 5.7 ±0.2    | 5.5 ±0.03     | NS                 | 6.0± 0.3                 | 6.2± 0.2 <sup>†</sup>    | NS                  |
| <b>Fasting Plasma Glucose (mg/dL)</b>       | 98.2 ±5.1   | 89.9 ±1.0     | <0.05              | 109.1± 5.8*              | 114.7± 6.6 <sup>†</sup>  | NS                  |
| <b>2 Hour Plasma Glucose (mg/dL)</b>        | 121.9 ±11.3 | 125.0 ±4.2    | NS                 | 154.1±<br>13.9*          | 196.0± 11.9 <sup>†</sup> | <0.05               |
| <b>Fasting Plasma Insulin (uIU/mL)</b>      | 6.5 ±0.6    | 7.8 ±0.6      | NS                 | 13.3± 2.0*               | 12.5± 1.7**              | NS                  |
| <b>2 Hour Plasma Insulin (uIU/mL)</b>       | 34.5 ±4.9   | 73.3 ±7.3     | <0.0001            | 77.0± 15.8*              | 124.3± 18.0**            | <0.05               |
| <b>Matsuda Index</b>                        | 9.1 ±1.8    | 6.4 ±0.6      | <0.05              | 3.3± 0.5 <sup>†</sup>    | 3.7± 0.6 <sup>†</sup>    | NS                  |

Data are mean ± SE

Significance of <0.05 indicated by \*, <0.001 by \*\*, and <0.0001 by <sup>†</sup> within sex for Met Syn-YES versus NO.
