# Supplementary material for: Whole Blood Gene Expression Profiles in Insulin Resistant Latinos with the Metabolic Syndrome
Source: PubMed Central journal article supplement (PMC3866261; doi:10.1371/journal.pone.0084002), 2013-12-17

**Figure S2** MAPK signaling genes with altered expression in individuals with metabolic syndrome. The dashed line indicates no change in gene expression. All probes were altered in expression  $\geq 1.2$  fold and  $P < 0.05$  (Benjamini Hochberg corrected)

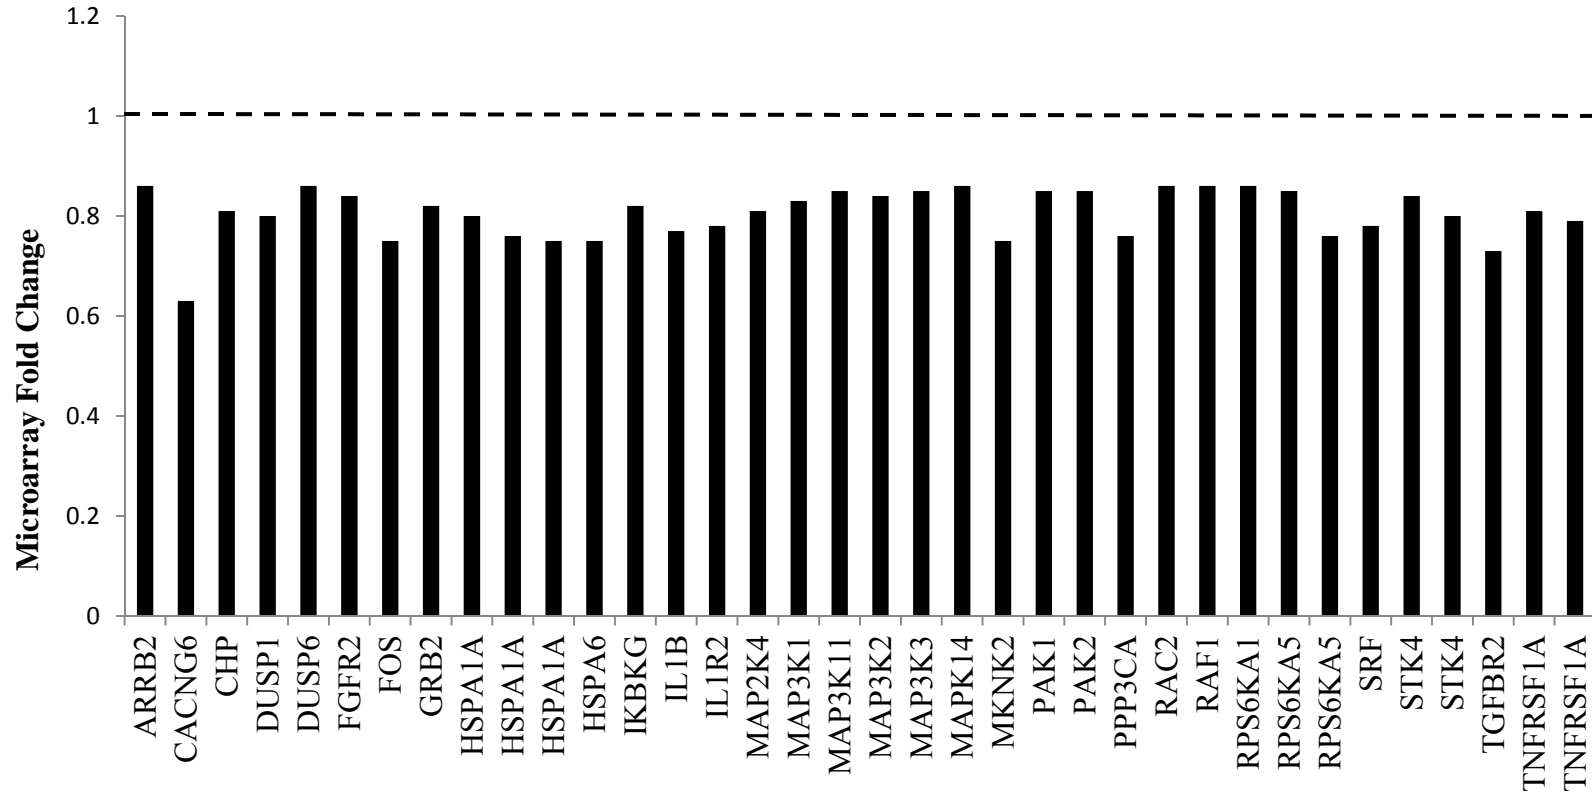

Supplement: pone.0084002.s004.pdf [file pone.0084002.s004.pdf]
